# Supplementary material for: Inhibition of skeletal growth of human prostate cancer by the combination of docetaxel and BKM1644: an aminobisphosphonate derivative
Source: PubMed Central journal article supplement (PMC5053666; doi:10.18632/oncotarget.8481), 2016-03-30
Supplement: oncotarget-07-27489-s001.pdf [file oncotarget-07-27489-s001.pdf]

# Inhibition of skeletal growth of human prostate cancer by the combination of docetaxel and BKM1644, an aminobisphosphonate derivative

## Supplementary Materials

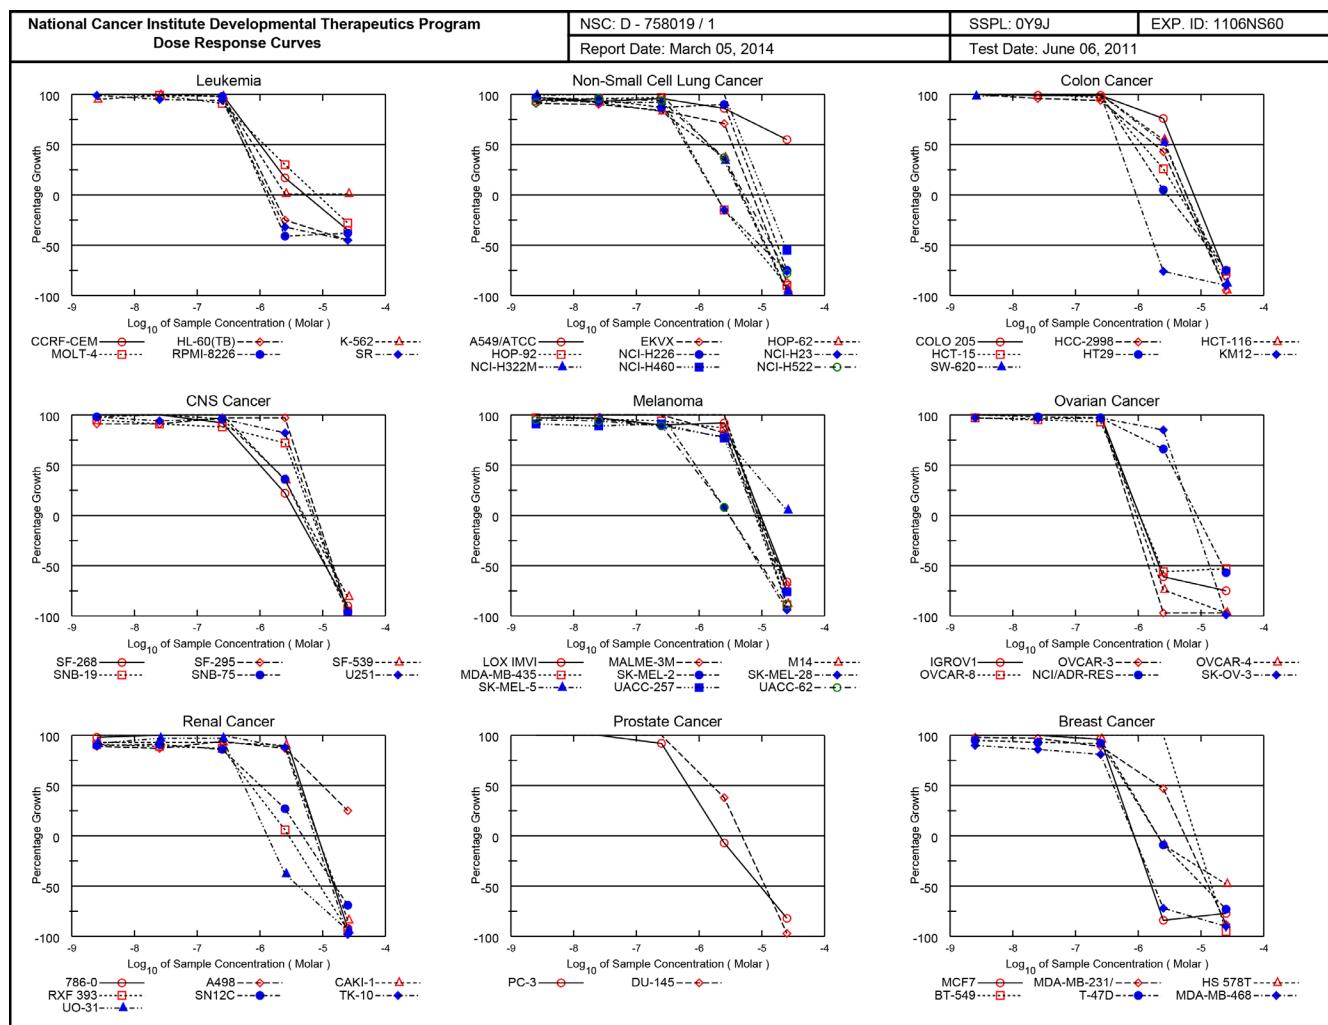



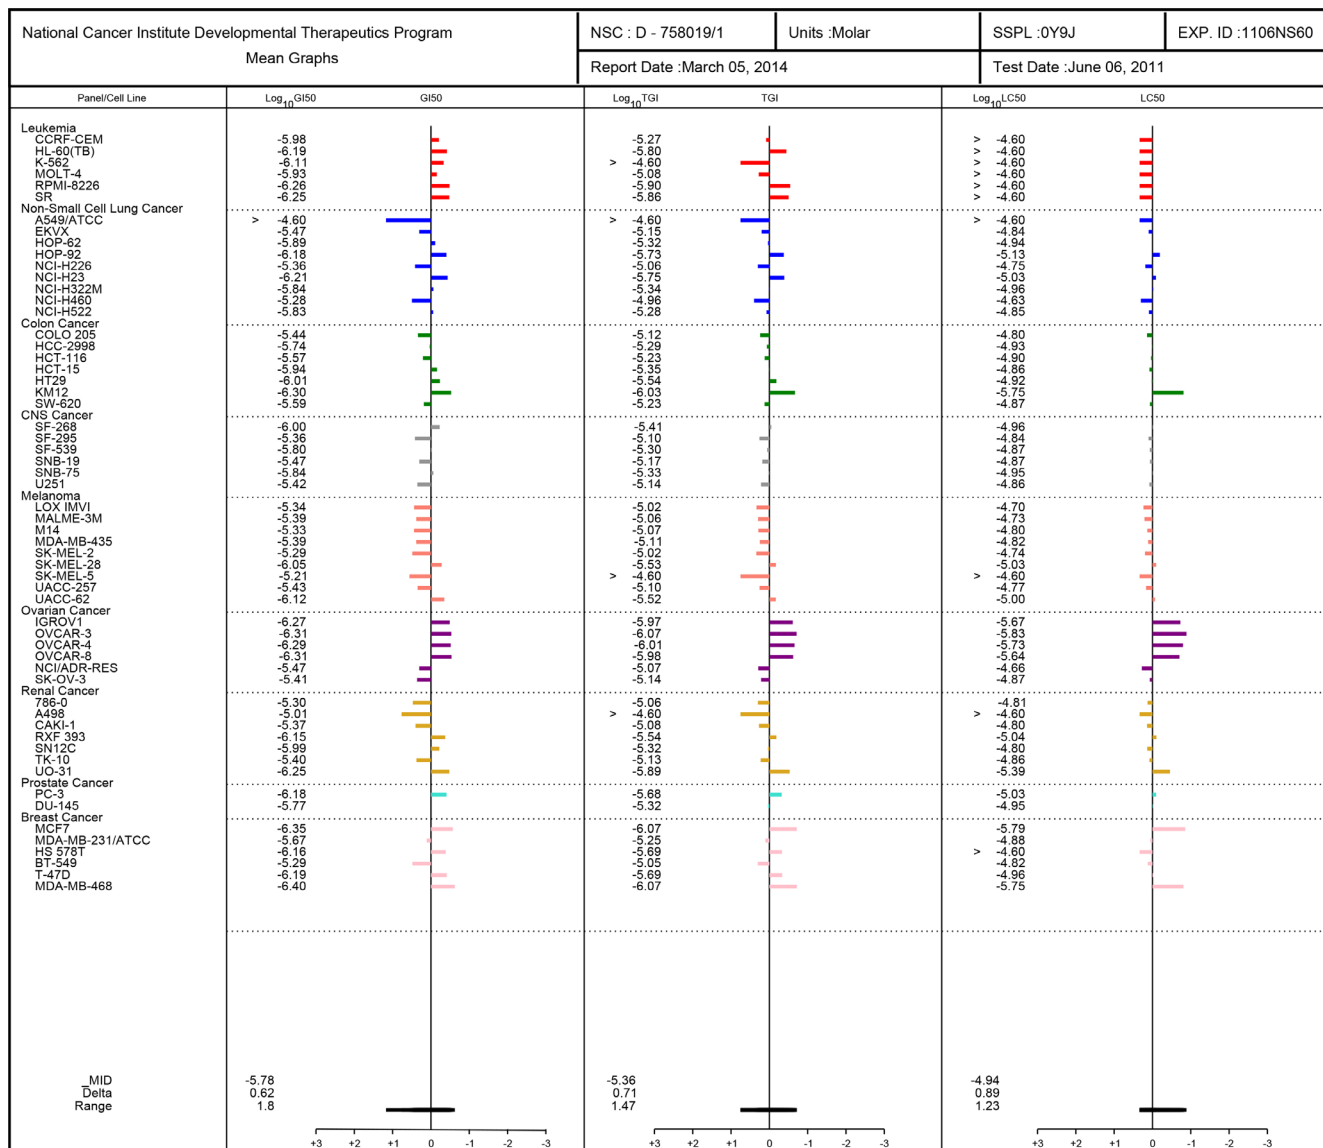

**Supplementary Figure S1: *In vitro* activity of BKM1644 in NCI-60 panel.** Compound activities presented as GI50, TGI (total growth inhibition) and LC50, using the median value as the y-axis, respectively.

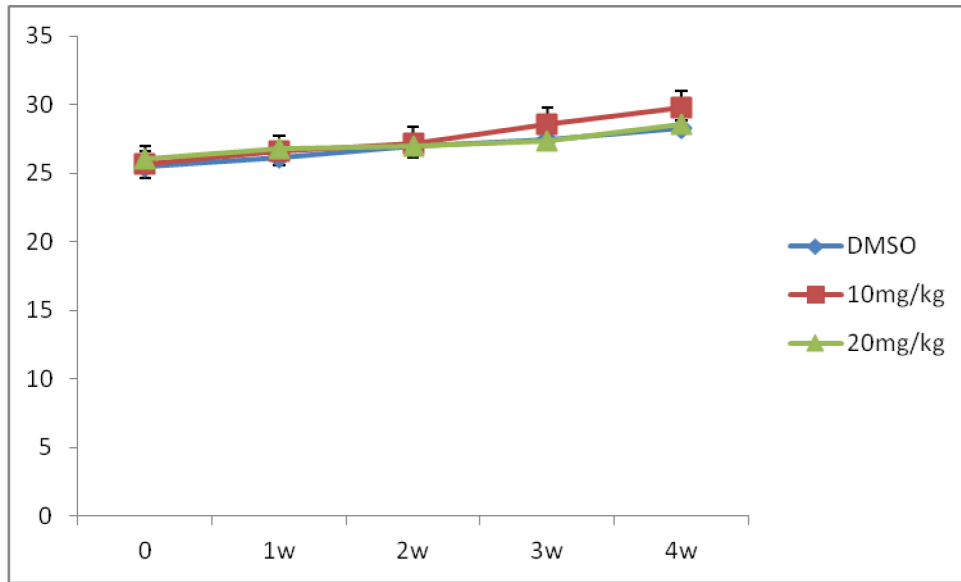

**Supplementary Figure S2: Body weight of mice treated with BKM1644 at 10 mg/kg and 20 mg/kg, and the vehicle control (DMSO) via i.p. route, 3 times per week for 4 weeks.  $n = 4$  per group.**
